# Supplementary material for: A Sulfur Dioxide Covariance-Based Retrieval Algorithm (COBRA): application to TROPOMI reveals new emission sources
Source: Copernicus journal article supplement (doi:10.5194/acp-2021-294), 2021-05-17

1 **Supplementary material of:**

2 **A Sulfur Dioxide Covariance-Based Retrieval Algorithm**  
3 **(COBRA): application to TROPOMI reveals new emission**  
4 **sources**

5 **Nicolas Theys<sup>1</sup>, Vitali Fioletov<sup>2</sup>, Can Li<sup>3,4</sup>, Isabelle De Smedt<sup>1</sup>, Christophe Lerot<sup>1</sup>, Chris**  
6 **McLinden<sup>2</sup>, Nickolay Krotkov<sup>3</sup>, Debora Griffin<sup>2</sup>, Lieven Clarisse<sup>5</sup>, Pascal Hedelt<sup>6</sup>, Diego**  
7 **Loyola<sup>6</sup>, Thomas Wagner<sup>7</sup>, Vinod Kumar<sup>7</sup>, Antje Innes<sup>8</sup>, Roberto Ribas<sup>8</sup>, François**  
8 **Hendrick<sup>1</sup>, Jonas Vlietinck<sup>1</sup>, Hugues Brenot<sup>1</sup>, Michel Van Roozendael<sup>1</sup>**

9

10 <sup>1</sup> Royal Belgian Institute for Space Aeronomy (BIRA-IASB), Brussels, Belgium.

11 <sup>2</sup> Air Quality Research Division, Environment and Climate Change Canada, Toronto, Canada.

12 <sup>3</sup> Atmospheric Chemistry and Dynamics Laboratory, NASA Goddard Space Flight Center,  
13 Greenbelt, MD, USA.

14 <sup>4</sup> Earth System Science Interdisciplinary Center, University of Maryland, College Park, MD, USA.

15 <sup>5</sup> Université libre de Bruxelles (ULB), Spectroscopy, Quantum Chemistry and Atmospheric  
16 Remote Sensing (SQUARES), C. P. 160/09, Brussels, Belgium.

17 <sup>6</sup> Institut für Methodik der Fernerkundung (IMF), Deutsches Zentrum für Luft und Raumfahrt  
18 (DLR), Oberpfaffenhofen, Germany.

19 <sup>7</sup> Max Planck Institute for Chemistry (MPIC), Hahn-Meitner-Weg 1, 55128 Mainz, Germany.

20 <sup>8</sup> European Centre for Medium-Range Weather Forecast (ECMWF), Shinfield Park, Reading, RG2  
21 9AX, UK.

22

23 *Correspondence to:* N. Theys ([theys@aeronomie.be](mailto:theys@aeronomie.be) )

24

**312 - 326 nm**

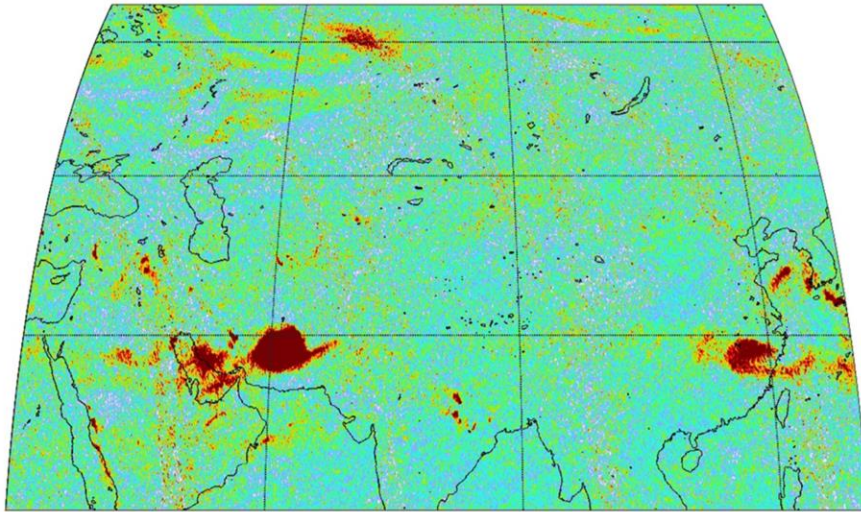

**310.5 - 326 nm**

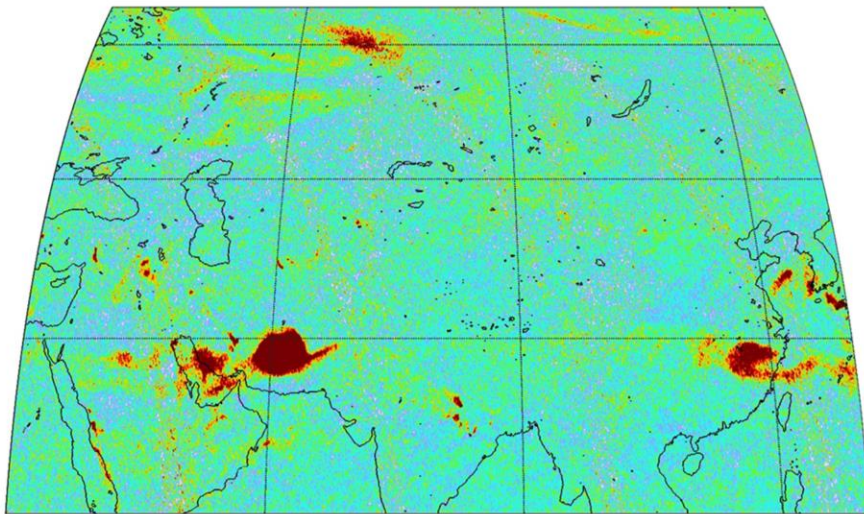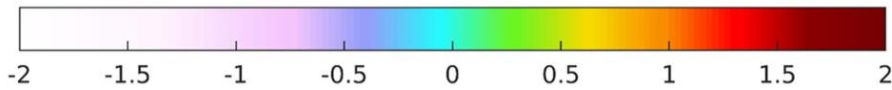

**SO<sub>2</sub> VCD (DU) 03 August 2019**

1

2 Figure S1. SO<sub>2</sub> vertical columns retrieved from TROPOMI measurements over Asia on 03 August  
3 2019 by the COBRA using wavelength ranges: (top) 312-326 nm and (bottom) 310.5-326 nm. All  
4 satellite pixels (for all rows) are used in the maps; a fixed AMF of 0.4 is applied for the SCD to  
5 VCD conversion.

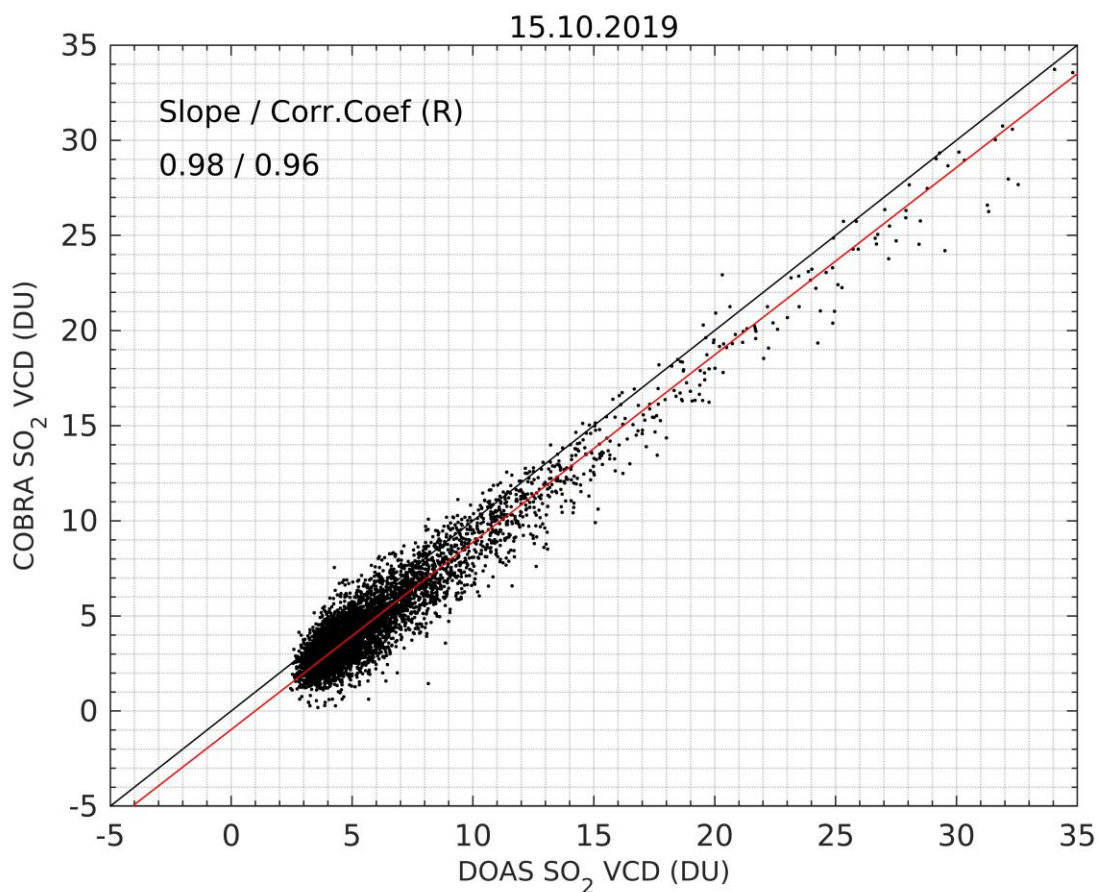

1

2 Figure S2. Comparison of SO<sub>2</sub> columns from TROPOMI COBRA and DOAS retrievals for  
3 October 15, 2019. Only the pixels with unambiguous detection of SO<sub>2</sub> were selected, based on the  
4 SO<sub>2</sub> detection flag from the operational product. The correlation coefficient and slope of the  
5 regression line are given as an inset.

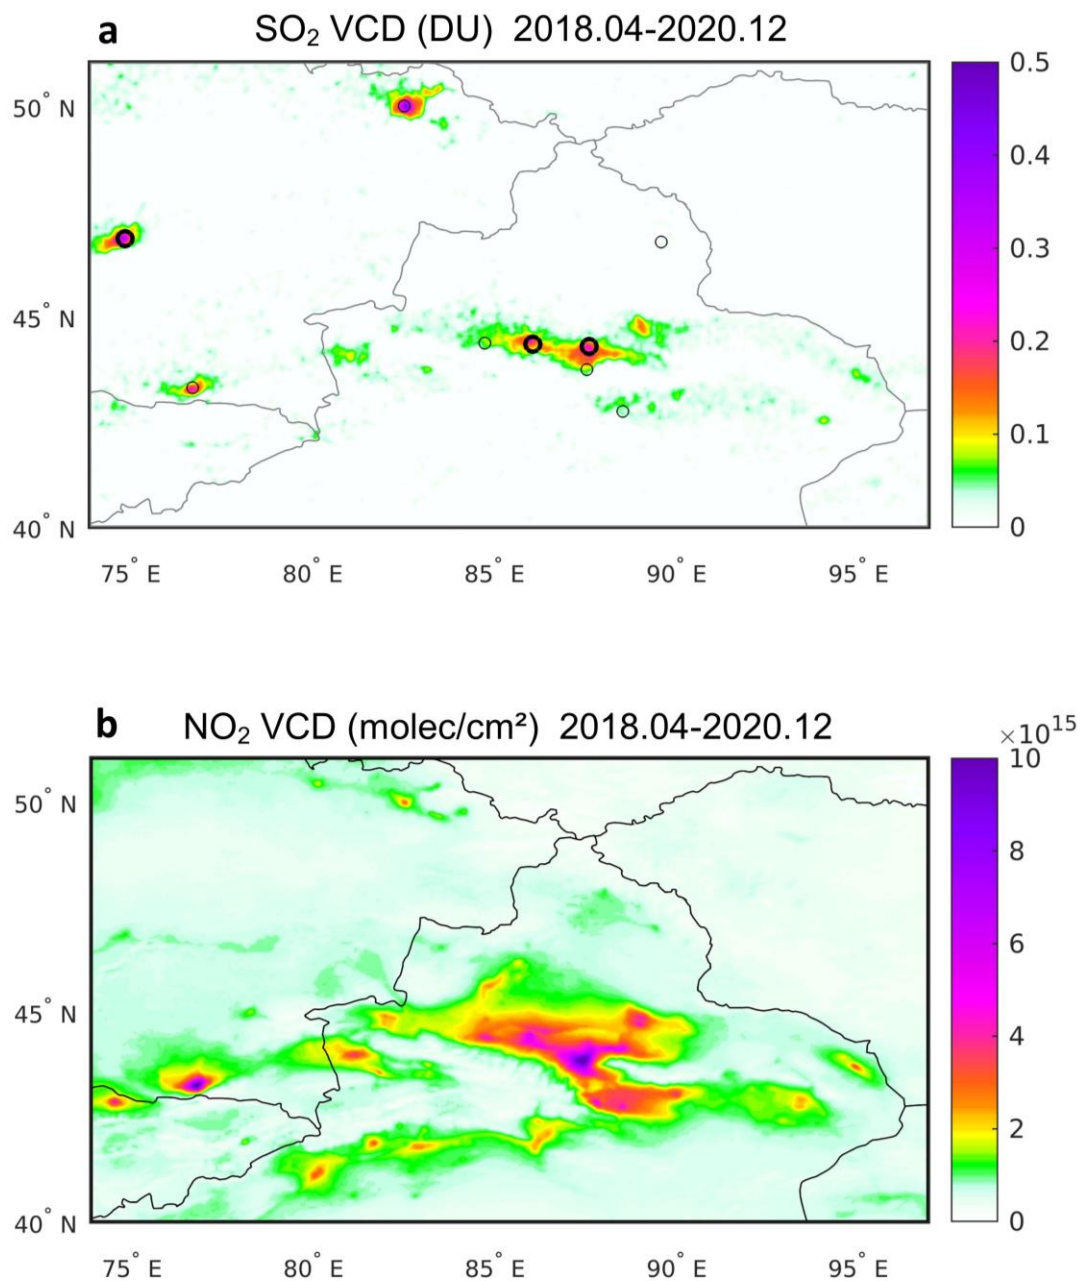

1  
 2 Figure S3. (a) SO<sub>2</sub> vertical columns retrieved by COBRA for TROPOMI measurements from April  
 3 2018 to December 2020, over a region covering north Xinjiang province (China), east Kazakhstan,  
 4 and parts of Kyrgyzstan and Mongolia. Black circles indicate SO<sub>2</sub> sources (coal power plants and  
 5 smelters) detected by OMI (in bold for the 2018-2019 period, see text). (b) same as (a) for the  
 6 tropospheric NO<sub>2</sub> vertical columns from TROPOMI operational product (OFL and RPRO  
 7 combined).

1 **Supplementary file:**

2 The global SO<sub>2</sub> vertical column map discussed in section 4 is included as supplement in the form  
3 of a geotiff file (S5P\_COBRA\_SO2\_VCD\_2018\_04\_2020\_12.tif), compatible with Google Earth  
4 viewer. The data is a long-term average of SO<sub>2</sub> columns over the period of April 2018 to December  
5 2020, for the latitudinal band 51°S-72°N. The SO<sub>2</sub> vertical column is in Dobson Unit and  
6 represented with the color scale below.

7

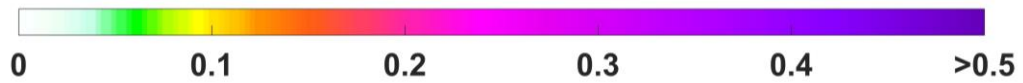

Supplement: Supplementary file 1 [file acp-2021-294-supplement.pdf]
